# Supplementary material for: Archaeometric Classification of Scattered Marble Fragments to Help the Reconstruction of Statues
Source: MDPI journal article supplement (doi:10.3390/min12121614), 2022-12-15
Supplement: s1 [file s1]

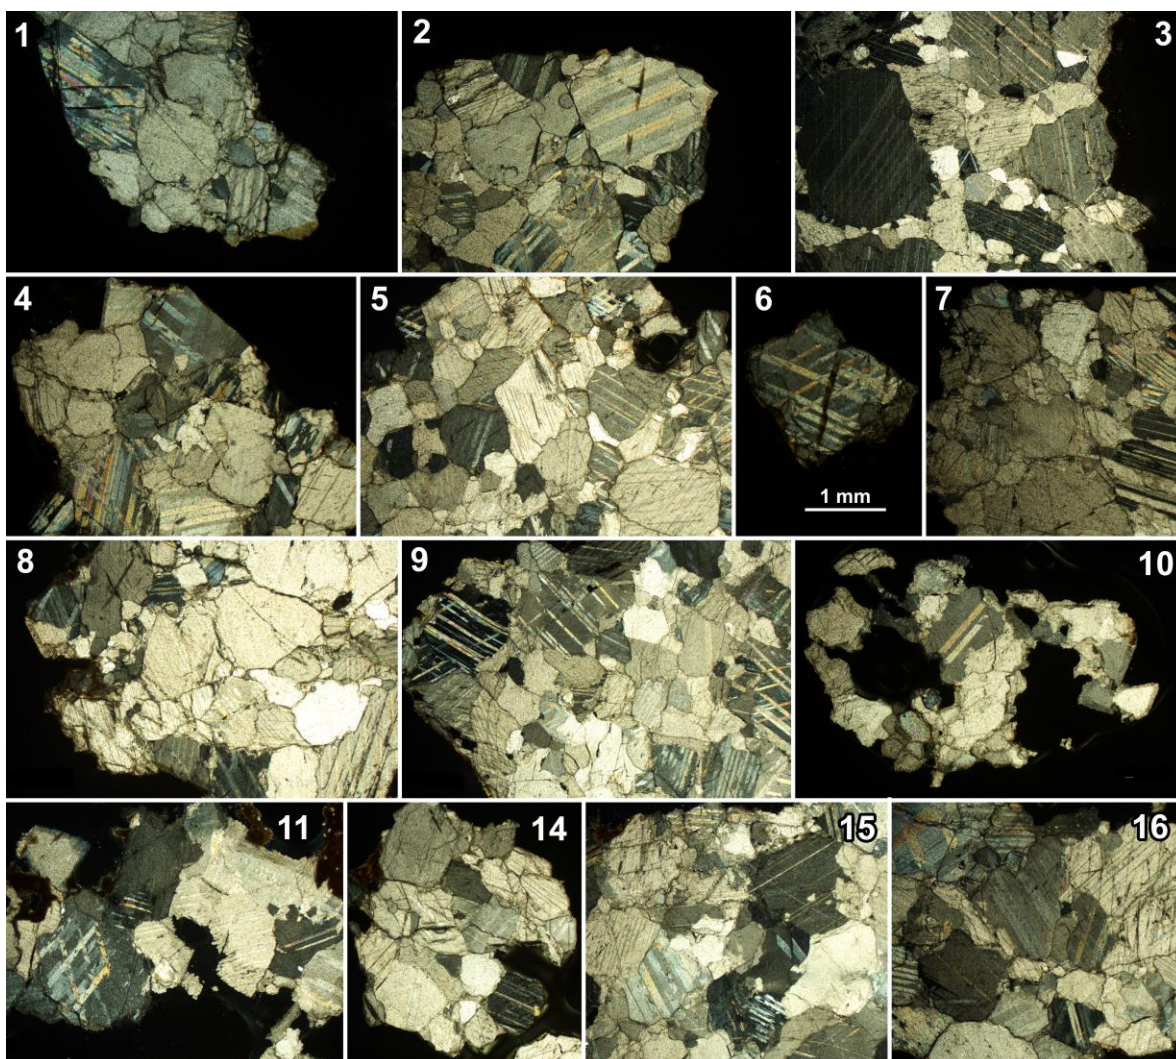

**Figure S1.** Illustrative micrographs of all the analyzed samples observed in XPL.

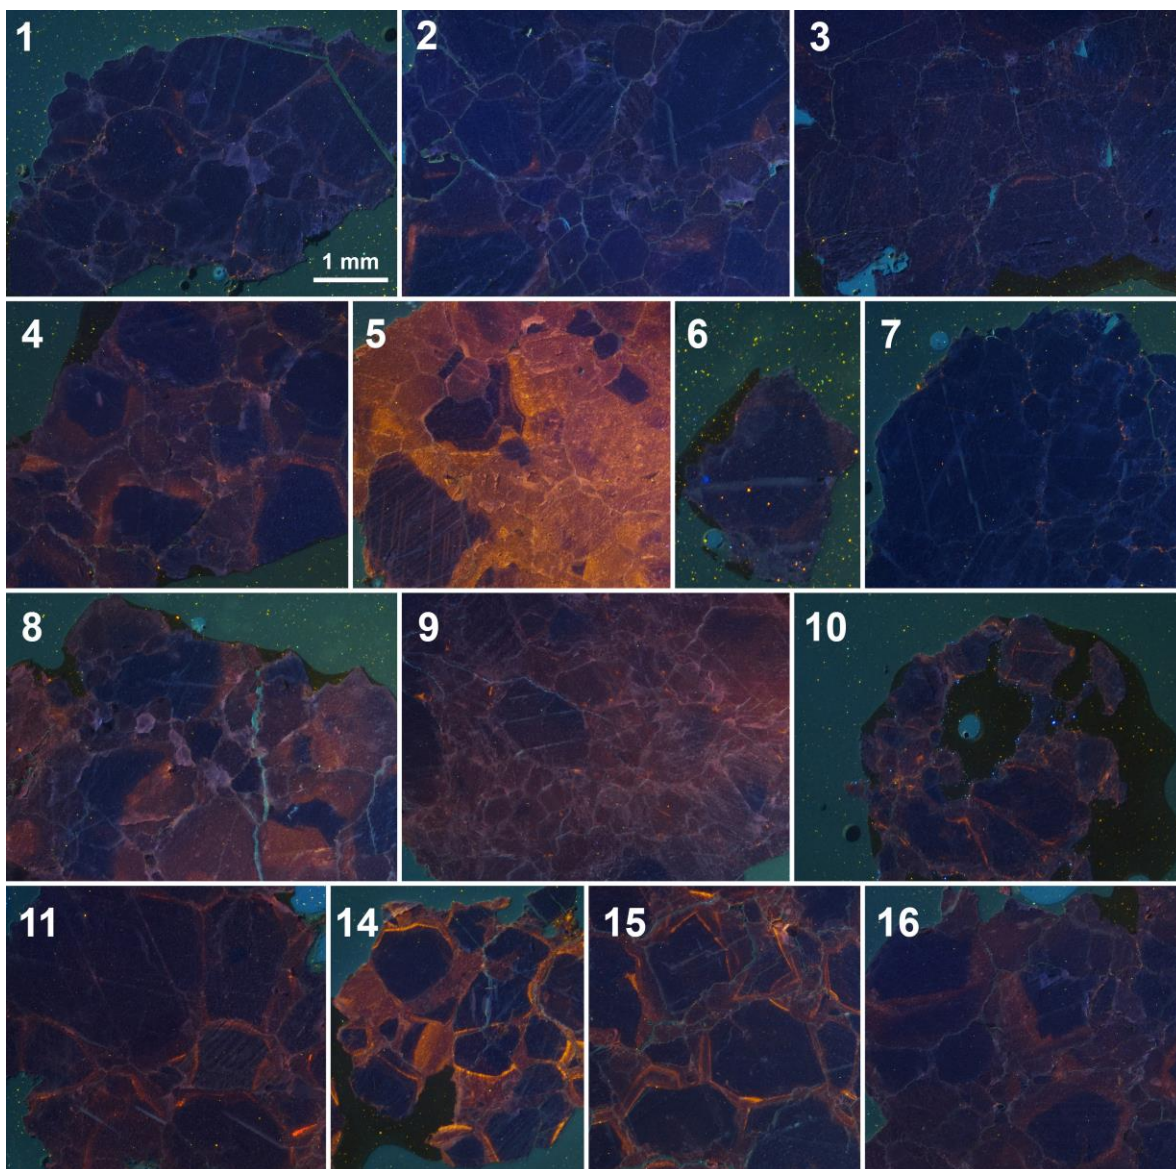

**Figure S2.** Illustrative micrographs of all the analyzed samples viewed under the CL microscope using an exposure time of 15 s.



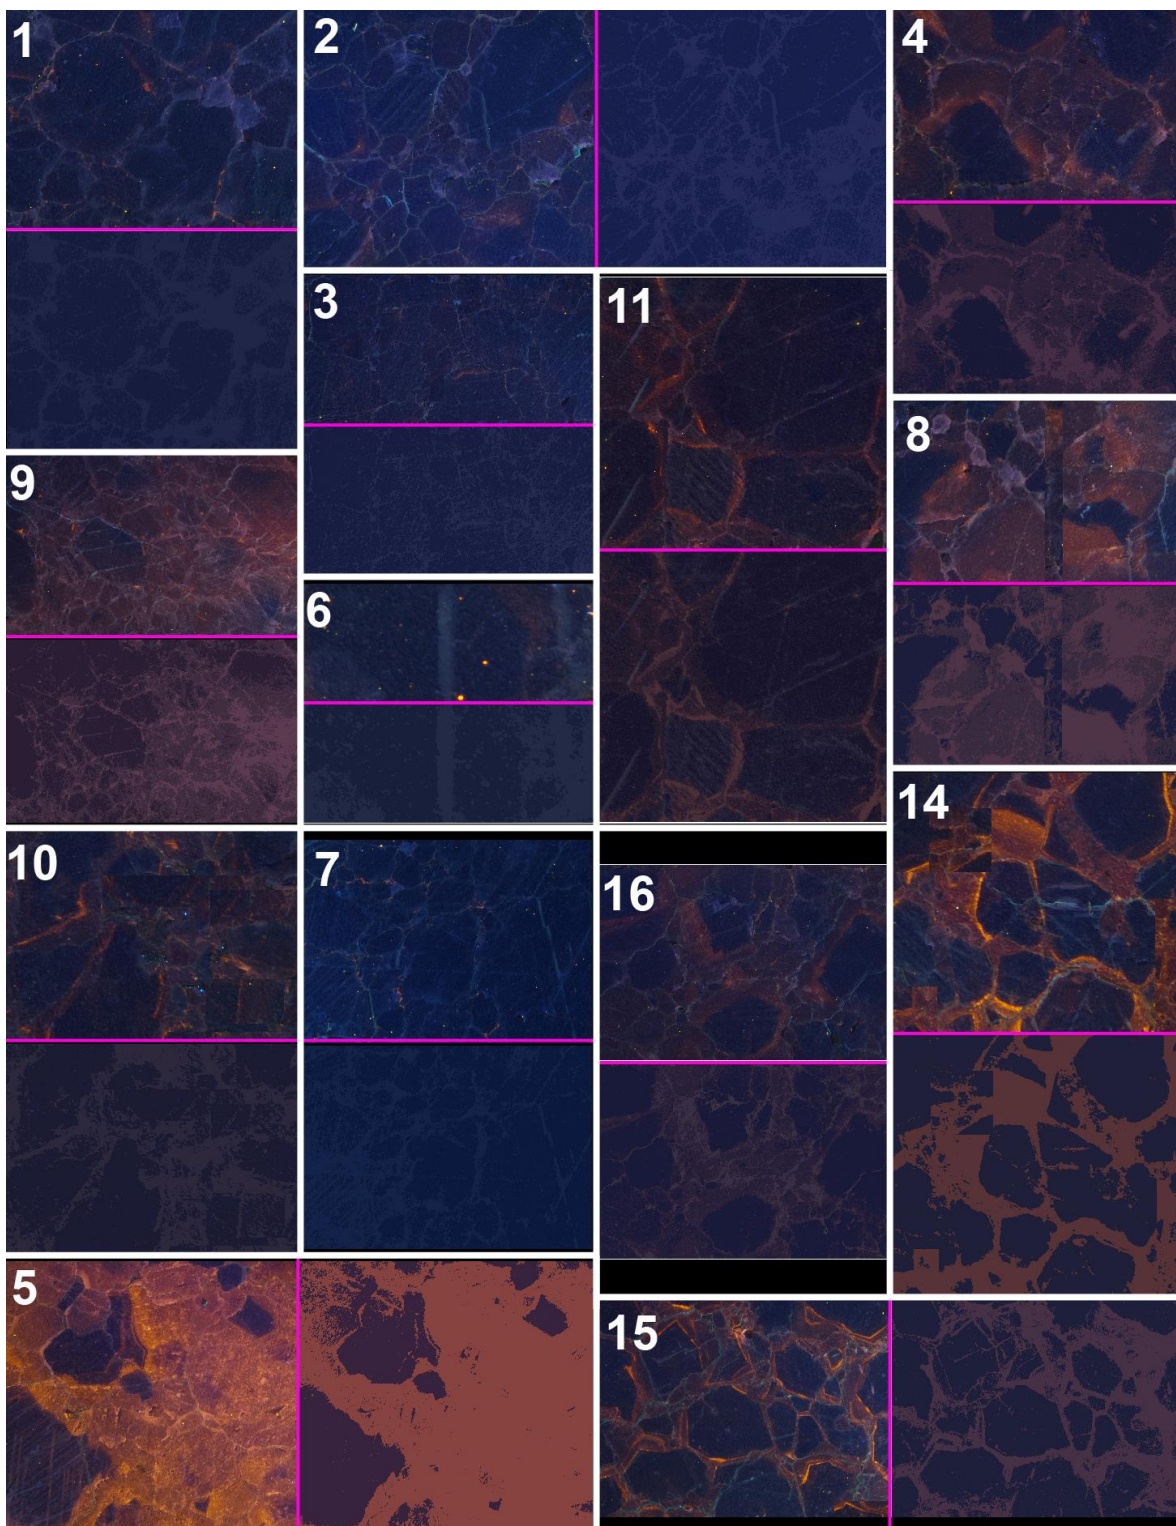

**Figure S3.** Cropped CL image areas (exposure time: 15 s) and their corresponding simplified versions obtained after application of the CLARA algorithm.
